# Supplementary material for: Organo-metallic electrolyte additive for regulating hydrogen evolution and self-discharge in Mg–air aqueous battery
Source: Royal Society of Chemistry journal article supplement (doi:10.1039/d2nj04488a), 2022-01-01
Supplement: d2nj04488a1.pdf [file d2nj04488a1.pdf]

## Organo-metallic electrolyte additives for regulating hydrogen evolution and self-discharge in Mg-air aqueous batteries

Kandeeban Rajagopalan<sup>a</sup>, Brindha Ramasubramanian<sup>b</sup>, Manojkumar Kaliannan<sup>a</sup>, Seeram Ramakrishna<sup>b</sup>, P. Marappan<sup>c</sup>, Ramasamy Kulandaivel Saminathan<sup>\*a</sup>

<sup>a</sup> Department of chemistry, Kongunadu arts and science college, G.N. Mills, Coimbatore, Tamil Nadu – 641029, India. E-mail: [ksaminath@gmail.com](mailto:ksaminath@gmail.com)

<sup>b</sup> Center for Nanofibers and Nanotechnology, Department of Mechanical Engineering, National University of Singapore, Singapore 117574, Singapore.

<sup>c</sup> SAM Technologies, Coimbatore – 641029, India

**Table s1** Corrosion inhibition over elevated temperatures

| Temp<br>Conc<br>of<br>Inhibitor | 303 K                              |       | 313 K                              |       | 323 K                              |       | 333 K                              |       |
|---------------------------------|------------------------------------|-------|------------------------------------|-------|------------------------------------|-------|------------------------------------|-------|
|                                 | CR<br>X 10 <sup>-2</sup><br>(mmpy) | IE%   | CR<br>X 10 <sup>-2</sup><br>(mmpy) | IE %  | CR<br>X 10 <sup>-2</sup><br>(mmpy) | IE %  | CR<br>X 10 <sup>-2</sup><br>(mmpy) | IE %  |
| 0                               | 127.04                             |       | 140.46                             |       | 147.36                             |       | 155.32                             |       |
| 200                             | 49.72                              | 59.95 | 81.72                              | 41.46 | 96.52                              | 34.19 | 110.3                              | 28.83 |
| 300                             | 38.54                              | 69.85 | 75.94                              | 45.83 | 89.26                              | 39.47 | 103.51                             | 33.15 |
| 400                             | 30.44                              | 75.79 | 69.38                              | 50.74 | 81.07                              | 44.64 | 96.65                              | 37.91 |
| 500                             | 15.54                              | 87.79 | 63.63                              | 54.47 | 74.92                              | 49.16 | 90.26                              | 41.64 |
| 600                             | 12.62                              | 89.46 | 46.49                              | 66.61 | 65.54                              | 55.40 | 84.32                              | 45.66 |
| 700                             | 12.93                              | 89.23 | 48.92                              | 65.61 | 66.46                              | 54.76 | 84.76                              | 44.82 |
| 800                             | 13.41                              | 89.03 | 48.54                              | 65.35 | 67.44                              | 54.14 | 87.49                              | 43.51 |

**Table s2** Isotherm parameters with varying temperature and concentrations

| Inhibitor<br>concentration<br>(g/L) X 10 <sup>-1</sup> | Surface coverage ( $\theta$ )<br>x10 <sup>2</sup> |        |        |        | C/ $\theta$<br>x10 <sup>2</sup> |            |            |            |
|--------------------------------------------------------|---------------------------------------------------|--------|--------|--------|---------------------------------|------------|------------|------------|
|                                                        | 303 K                                             | 313 K  | 323 K  | 333 K  | 303 K                           | 313 K      | 323 K      | 333 K      |
|                                                        | 0.2                                               | 0.5995 | 0.4146 | 0.3419 | 0.2883                          | 0.33361134 | 0.482393   | 0.58496636 |
| 0.3                                                    | 0.6985                                            | 0.4584 | 0.3947 | 0.3315 | 0.42949177                      | 0.65445    | 0.76007094 | 0.904977   |
| 0.4                                                    | 0.7579                                            | 0.5074 | 0.4187 | 0.3791 | 0.52777411                      | 0.788333   | 0.95533795 | 1.055131   |
| 0.5                                                    | 0.8394                                            | 0.5732 | 0.4662 | 0.4164 | 0.59566357                      | 0.872296   | 1.07250107 | 1.200768   |
| 0.6                                                    | 0.91                                              | 0.65   | 0.5317 | 0.4566 | 0.65934066                      | 0.923077   | 1.1284559  | 1.31406    |
| 0.7                                                    | 0.9124                                            | 0.6651 | 0.5535 | 0.474  | 0.76720737                      | 1.052473   | 1.26467931 | 1.476793   |
| 0.8                                                    | 0.9125                                            | 0.6794 | 0.5857 | 0.4802 | 0.87671233                      | 1.17751    | 1.36588697 | 1.665973   |

**Table s3** Potentiodynamic polarization measurements

| Parameters<br>(g) X 10 <sup>-1</sup> | I <sub>corr</sub><br>( $\mu$ A) | -E <sub>corr</sub><br>(V) | Linear<br>polarization<br>(ohm) | Cathode<br>slope<br>(mV<br>dec <sup>-1</sup> ) | Anode<br>slope<br>(mV<br>dec <sup>-1</sup> ) | Corrosion<br>rate<br>(mil/year)<br>e-1 | Inhibition<br>efficiency<br>(%) |
|--------------------------------------|---------------------------------|---------------------------|---------------------------------|------------------------------------------------|----------------------------------------------|----------------------------------------|---------------------------------|
| Plain                                | 157.4                           | 1.49                      | 47991                           | 5.839                                          | 4.903                                        | 5.760                                  |                                 |
| 2                                    | 72.6                            | 1.45                      | 42486                           | 4.946                                          | 5.011                                        | 2.046                                  | 64.47917                        |
| 4                                    | 44.1                            | 1.43                      | 39489                           | 5.110                                          | 5.061                                        | 1.213                                  | 78.94097                        |
| 6                                    | 21.1                            | 1.43                      | 38826                           | 5.140                                          | 5.004                                        | 0.538                                  | 90.65972                        |
| 8                                    | 31.8                            | 1.43                      | 48923                           | 4.792                                          | 4.810                                        | 1.476                                  | 74.375                          |

**Table s4** Comparison with previous works regarding corrosion inhibitor

| S. no. | Material | Inhibitor                                                       | Concentration of Inhibitor | Electrolyte | Efficiency | References   |
|--------|----------|-----------------------------------------------------------------|----------------------------|-------------|------------|--------------|
| 1.     | AZ91D    | walnut green husk extract                                       | 1.0 g L <sup>-1</sup>      | NaCl        | 92.5 %     | <sup>1</sup> |
| 2.     | AM50     | 3-amino-1,2,4-triazole-5-thiol (ATT) and NaF                    | 50 mM NaF : 5 mM ATT       | NaCl        | 95.8%      | <sup>2</sup> |
| 3.     | AZ31B    | benzyl triphenyl phosphonium bis(trifluoromethylsulfonyl) amide | 0.30 mM                    | NaCl        | 91.4%      | <sup>3</sup> |
| 4.     | AZ31     | sodium molybdate                                                | 150 mM                     | NaCl        | 78%        | <sup>4</sup> |
| 5.     | AZ31     | Hexamethyl cyclotrisiloxane                                     | 600 ppm                    | NaCl        | 92%        | This work    |

**Table s5** Comparison with previous works regarding corrosion inhibitor in Mg-Air Battery

| S. no. | Material | Inhibitor                      | Concentration of Inhibitor | Electrolyte | Efficiency                                                                 | References   |
|--------|----------|--------------------------------|----------------------------|-------------|----------------------------------------------------------------------------|--------------|
| 1.     | Pure Mg  | Complexing agent               | 0.05 M                     | NaCl        | Improvement of 210 mV during discharge                                     | <sup>5</sup> |
| 2.     | AZ91     | Sodium Phosphate               | 0.5 g · L <sup>-1</sup>    | NaCl        | discharge potential increases from 1.120 V to 1.150 V                      | <sup>6</sup> |
| 3.     | AZ91     | Sodium Dodecylbenzenesulfonate | 0.5 g · L <sup>-1</sup>    | NaCl        | inhibition efficiency can reach 95.2%                                      | <sup>6</sup> |
| 4.     | Pure Mg  | Decyl glucoside                | 4.5 mM                     | NaCl        | Inhibition efficiency 94%                                                  | <sup>7</sup> |
| 5.     | AZ31     | Hexamethyl cyclotrisiloxane    | 600 ppm                    | NaCl        | Inhibition efficiency 92%, with an anodic utilization efficiency of 60.08% | This work    |

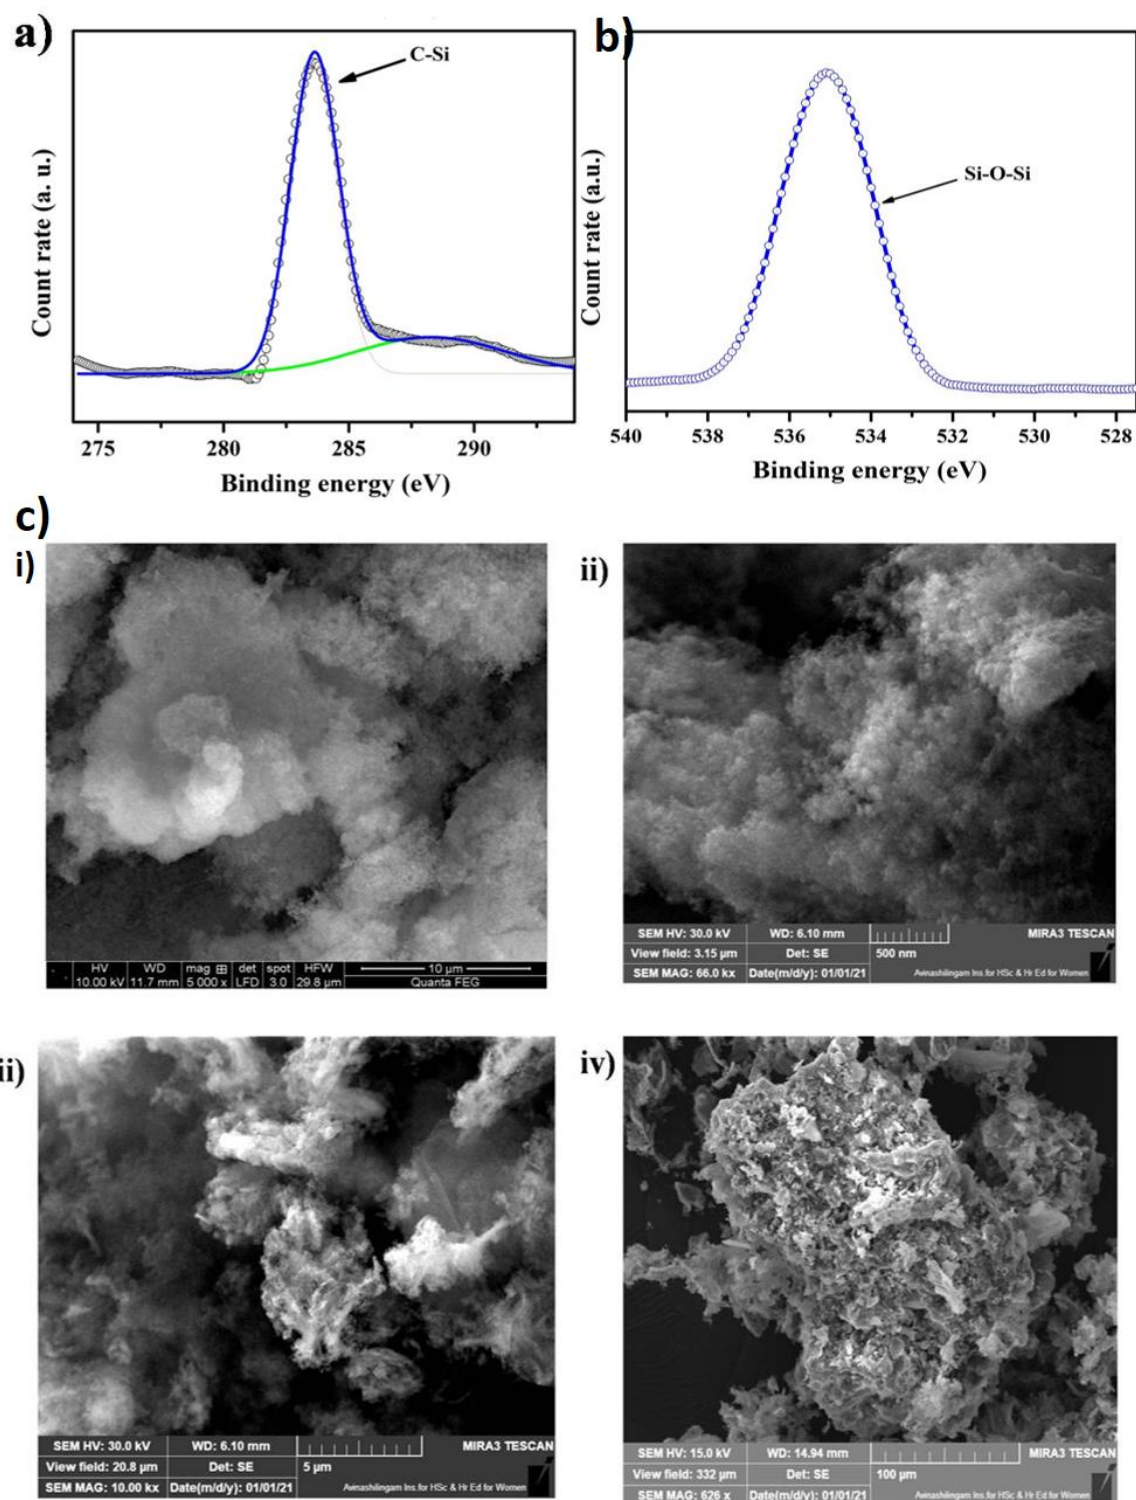

Figure s1: a,b) XPS spectra of D3, c) SEM of synthesized D3

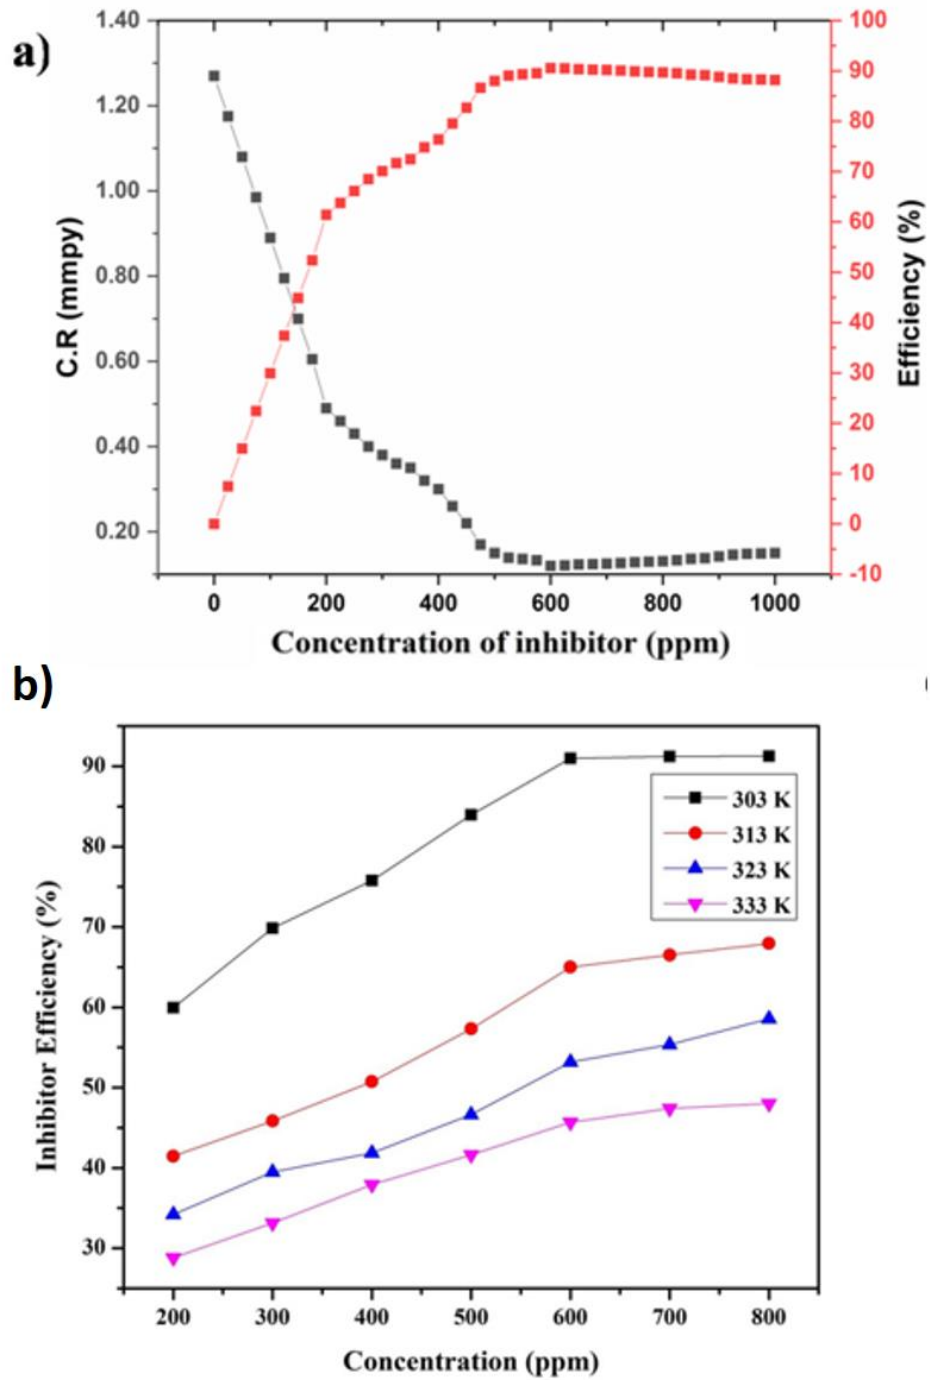

Figure s2: a) Corrosion rate and Efficiency over various concentration protected Mg alloy, b) Inhibitor efficiency over various concentrations at elevated temperatures

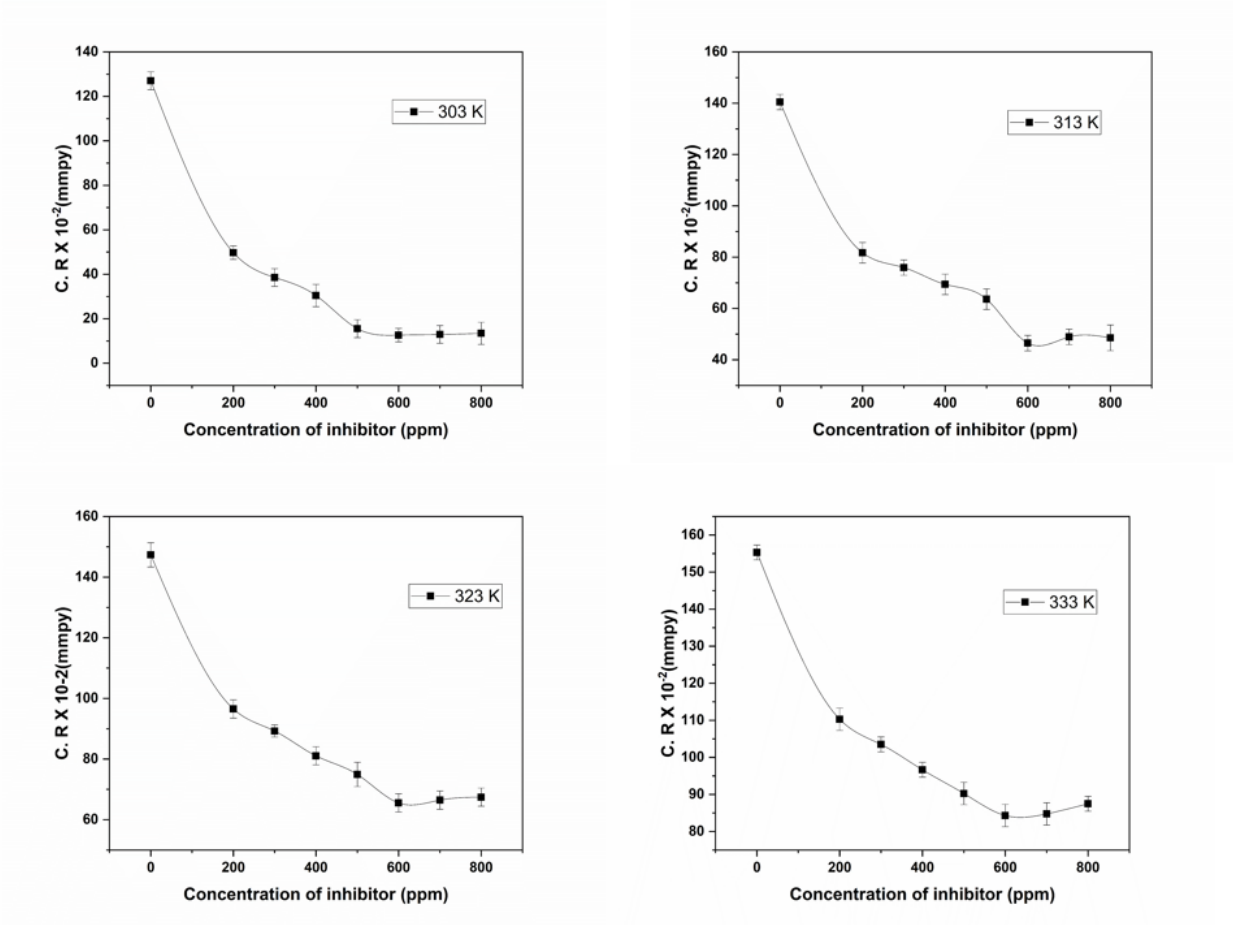

Figure s3: The standard deviation error bar marked values of corrosion rate over different concentration of inhibitor at a) 303K, b) 313 K, c) 323 K, d) 333 K

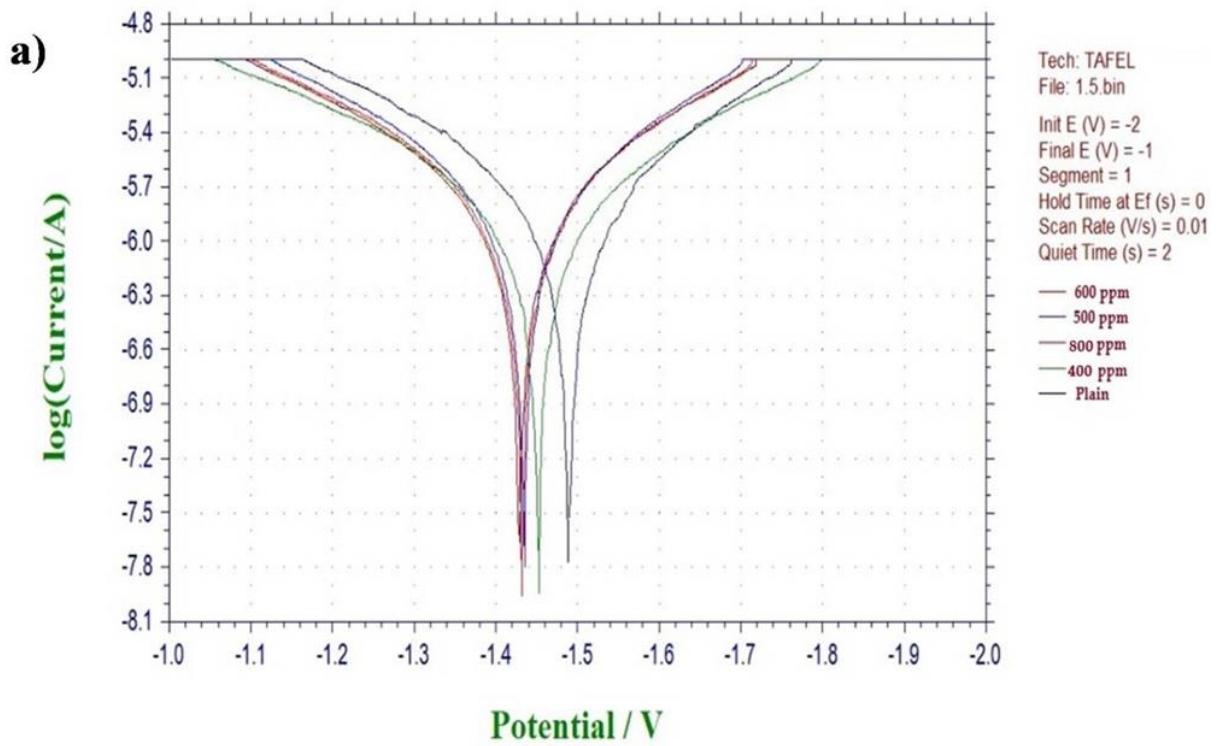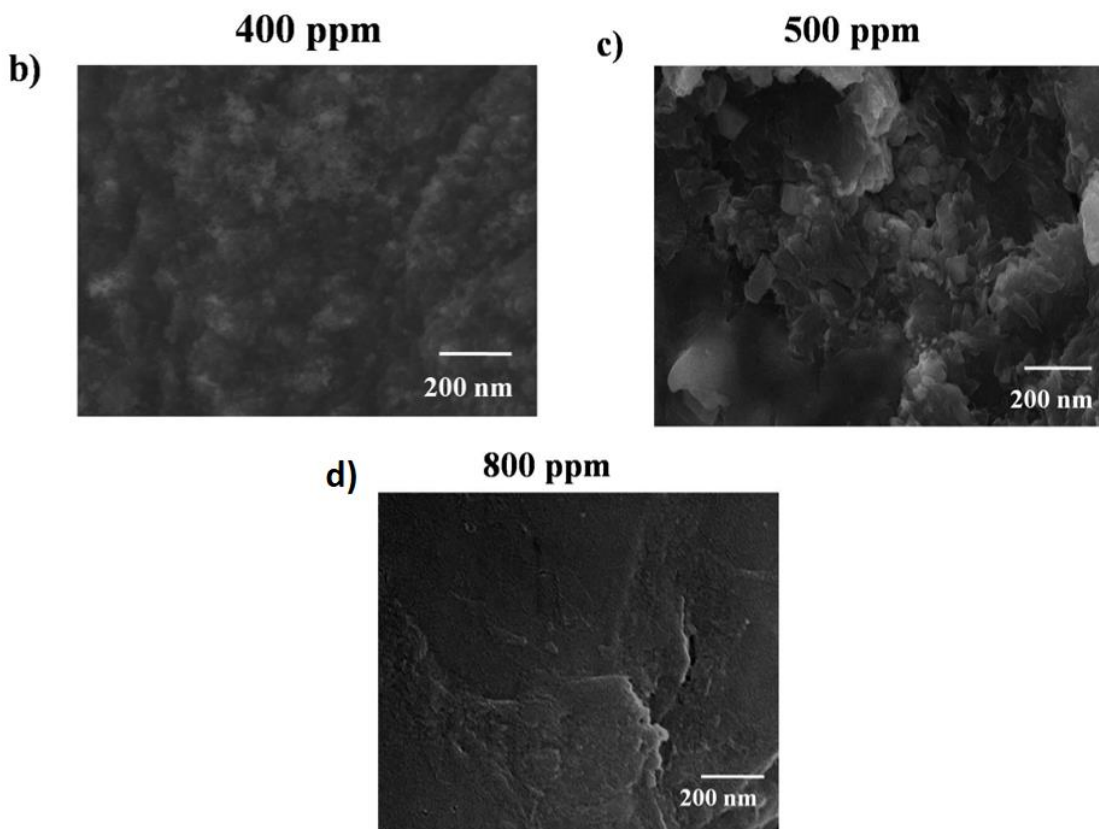

Figure s4: a) Potentiodynamic polarization of Mg with and without D3, b-d) different concentration of D3 inhibitor protected Mg alloy

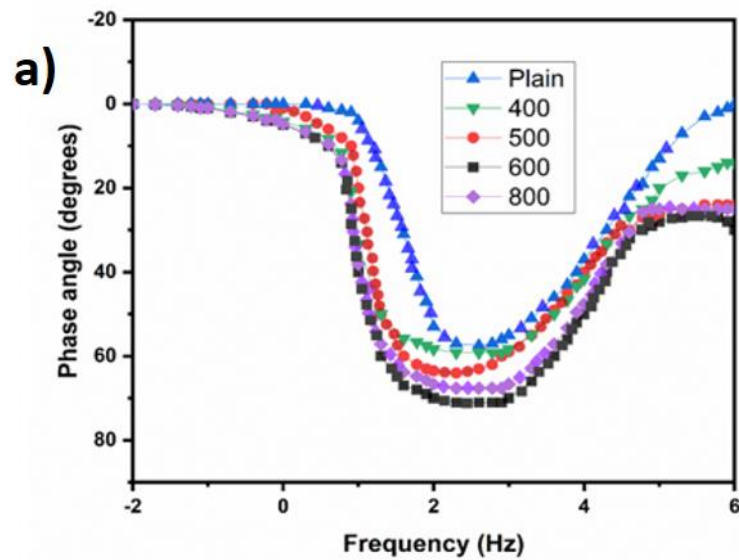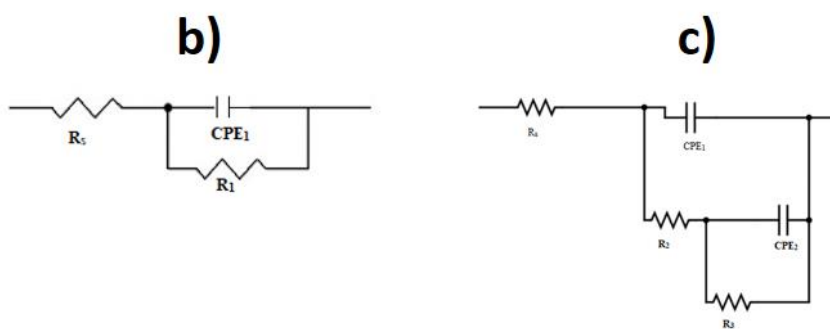

Figure s5: a) Bode-phase plot, b) circuit fitted for plain corrosive medium,  
c) Circuit fitted for inhibitor added medium



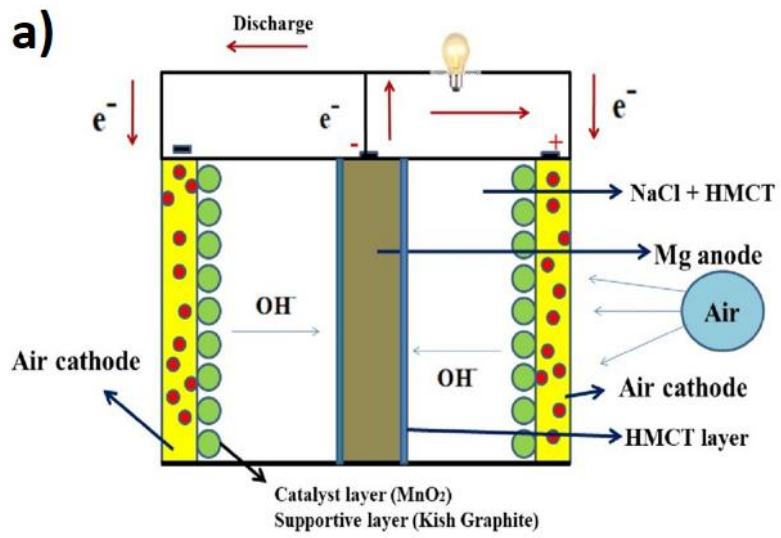

Figure s6: a) Design of fabricated cell system

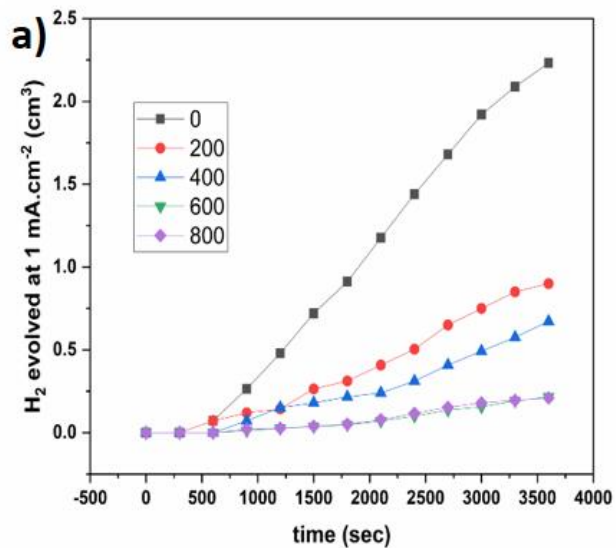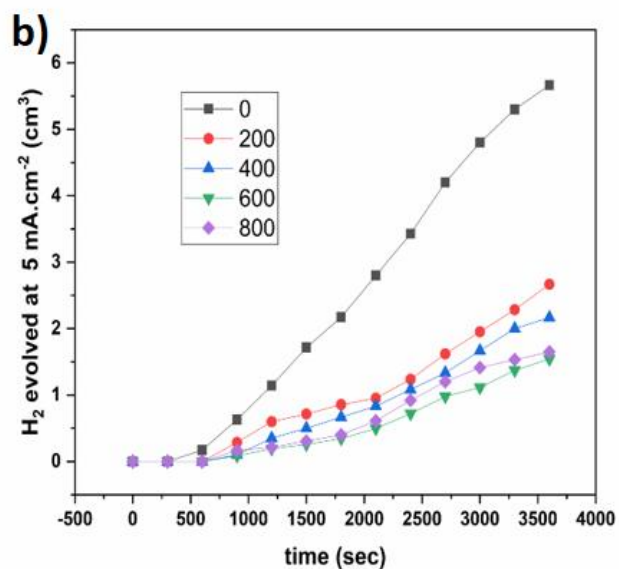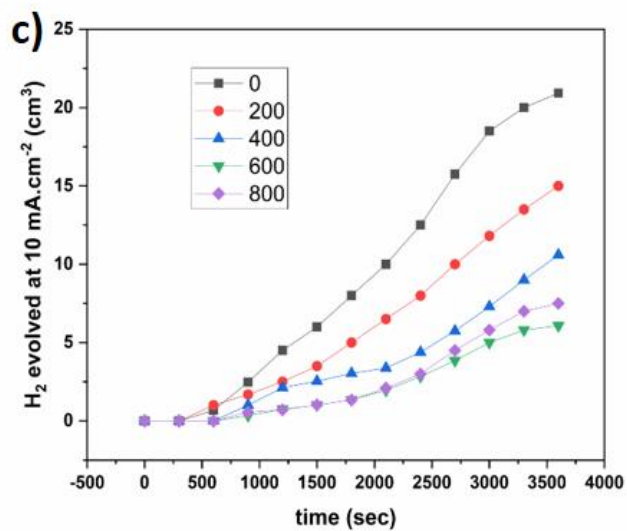

Figure s7: Hydrogen evolution of D3 protected Mg-air battery at a) 1 mA. cm<sup>-2</sup> b) 5 mA. cm<sup>-2</sup> c) 10 mA. cm<sup>-2</sup>

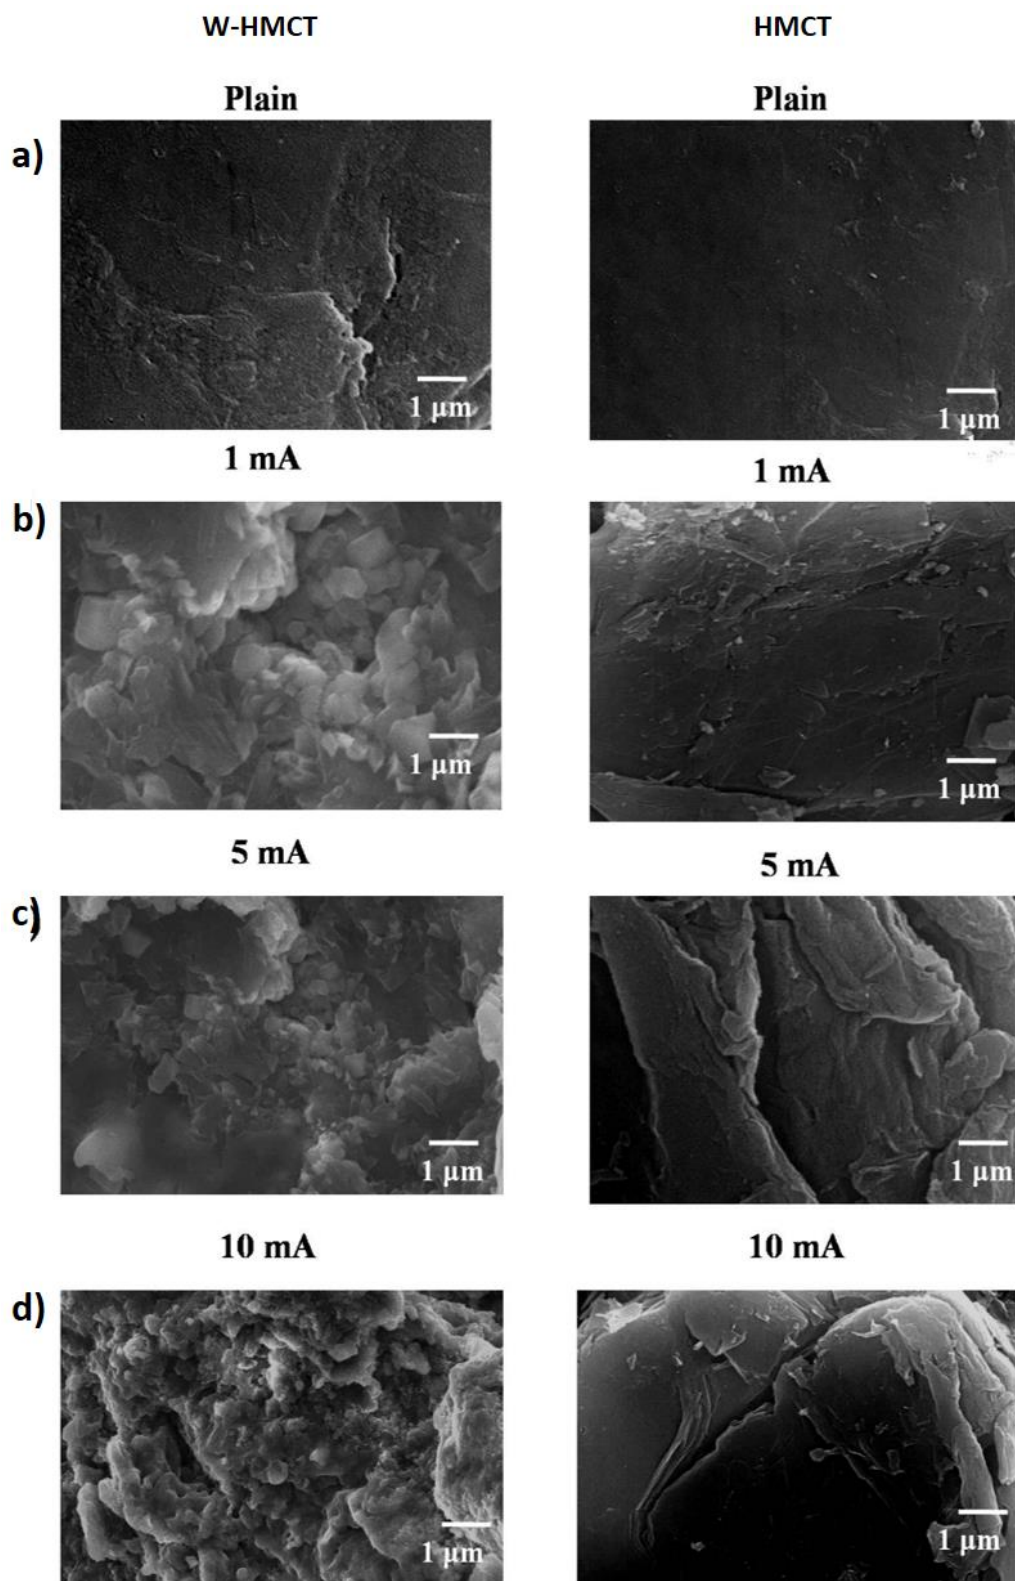

Figure s8: AFM images of anode Mg alloy after battery discharge at different current densities

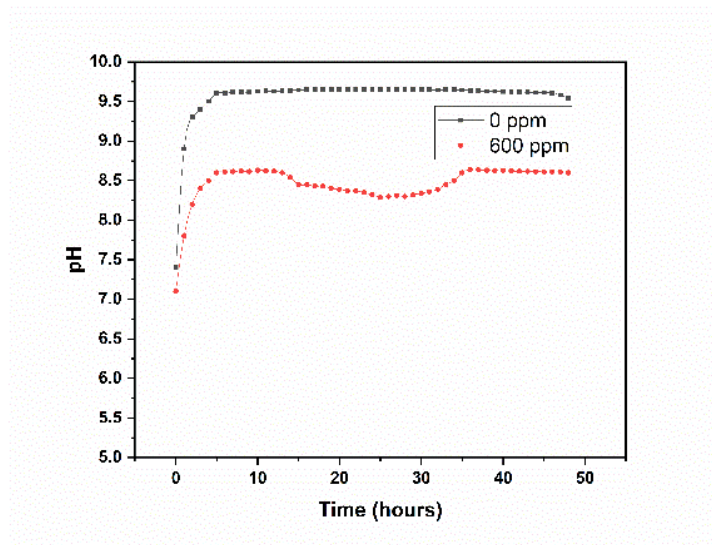

Figure s9: pH of the electrolyte with and without inhibitor during discharge

## References:

- 1 Y. Wu, Y. Zhang, Y. Jiang, N. Li, Y. Zhang, L. Wang and J. Zhang, *Colloids Surfaces A Physicochem. Eng. Asp.*, 2021, **626**, 126969.
- 2 D. Huang, J. Tao, M. Cheng, R. Deng, S. Chen, L. Yin and R. Li, *J. Hazard. Mater.*, 2020, 124399.
- 3 H. Su, Y. Liu, X. Gao, Y. Qian, W. Li, T. Ren, L. Wang and J. Zhang, *Corrosion inhibition of magnesium alloy in NaCl solution by ionic liquid: Synthesis, electrochemical and theoretical studies*, Elsevier B.V., 2019, vol. 791.
- 4 M. A. Osipenko, D. S. Kharytonau, A. A. Kasach, J. Ryl, J. Adamiec and I. I. Kurilo, *Electrochim. Acta*, 2022, **414**, 140175.
- 5 B. Vaghefinazari, D. Höche, S. V. Lamaka, D. Snihirova and M. L. Zheludkevich, *J. Power Sources*, , DOI:10.1016/j.jpowsour.2020.227880.
- 6 Y. Li, J. Ma, G. Wang, F. Ren, Y. Zhu and Y. Song, *J. Electrochem. Soc.*, 2018, **165**, A1713–A1717.
- 7 M. A. Deyab, *J. Power Sources*, 2016, **325**, 98–103.
